# Supplementary material for: A novel hairpin library-based approach to identify NBS–LRR genes required for effector-triggered hypersensitive response in Nicotiana benthamiana
Source: PubMed Central journal article supplement (PMC5408436; doi:10.1186/s13007-017-0181-7), 2017-04-28
Supplement: 13007_2017_181_MOESM1_ESM.pdf [file 13007_2017_181_MOESM1_ESM.pdf]

A

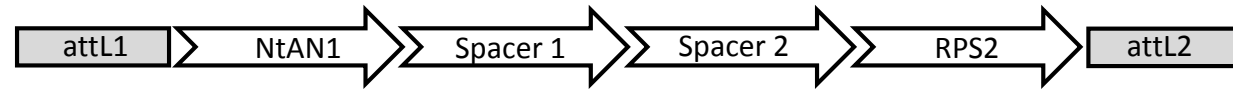

B

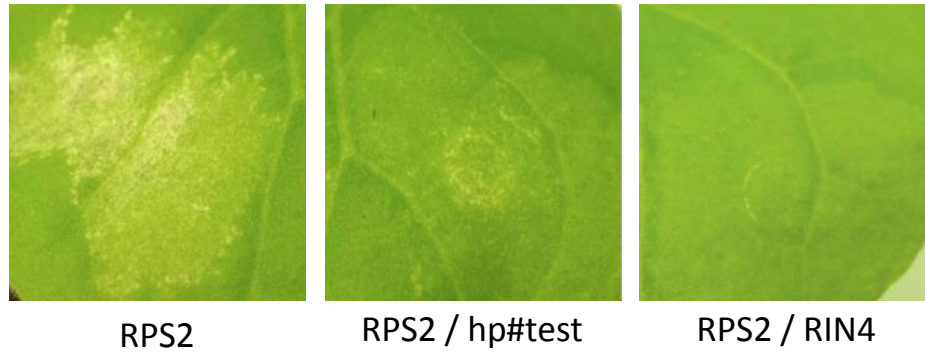

C

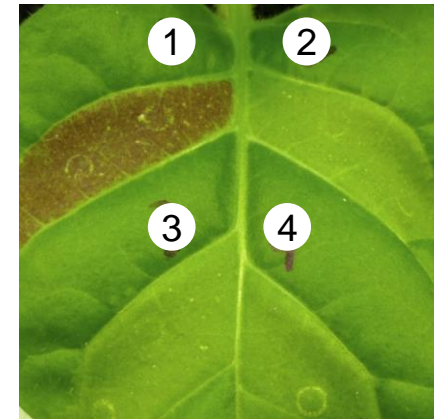

- 1 AcMYB110 / empty vector
- 2 AcMYB110 / hp#test
- 3 AcMYB110 / hp#NtAN1
- 4 hp#test / empty vector
